# Supplementary material
Source: PubMed Central journal article supplement (PMC4805870)
Supplement: mmc1.pdf [file mmc1.pdf]

# Variable Field Analytical Ultracentrifugation: II. Gravitational Sweep Sedimentation Velocity

Jia Ma<sup>1</sup>, Huaying Zhao<sup>1</sup>, Julia Sandmaier<sup>2</sup>, J. Alexander Liddle<sup>2</sup>, Peter Schuck<sup>1\*</sup>

<sup>1</sup>*Dynamics of Macromolecular Assembly Section, Laboratory of Cellular Imaging and Macromolecular Biophysics, National Institute of Biomedical Imaging and Bioengineering, National Institutes of Health, Bethesda, MD 20892, United States of America*

<sup>2</sup>*Center for Nanoscale Science and Technology, National Institute of Standards and Technology, Gaithersburg, MD 20899, United States of America*

## **Supplementary Material**

Table S1: Rotor speed schedules in Figure 1. Listed are the times after start of centrifugation at which a rotor speed change was initiated to the new target speed indicated. The time at which the new target was achieved is dependent on the rotor speed difference, and was based on an acceleration rate of 280 rpm/sec. In this form, the table adheres to the conventions in the speedsteps.txt file in SEDFIT.

| <b>time (sec)</b> | <b>power-law<br/>(rpm)</b> | <b>constant<br/>field (rpm)</b> | <b>linear<br/>(rpm)</b> | <b>ad hoc<br/>(rpm)</b> |
|-------------------|----------------------------|---------------------------------|-------------------------|-------------------------|
|                   | red                        | blue                            | orange                  | green                   |
| 0                 | 3,000                      | 18,970                          | 3,000                   | 5,000                   |
| 2,700             | 4,185                      | 26,833                          | 3,923                   | 10,000                  |
| 5,400             | 5,838                      | 32,863                          | 4,846                   | 20,000                  |
| 8,100             | 8,143                      | 37,947                          | 5,769                   | 28,000                  |
| 10,800            | 11,359                     | 42,426                          | 6,692                   | 35,000                  |
| 13,500            | 15,846                     | 46,476                          | 7,615                   | 40,000                  |
| 16,200            | 22,104                     | 50,200                          | 8,538                   | 45,000                  |
| 18,900            | 30,834                     | 53,666                          | 9,462                   | 49,000                  |
| 21,600            | 43,012                     | 56,921                          | 10,385                  | 53,000                  |
| 24,300            | 60,000                     | 60,000                          | 11,308                  | 57,000                  |
| 27,000            |                            |                                 | 12,231                  | 60,000                  |
| 29,700            |                            |                                 | 13,154                  |                         |
| 32,400            |                            |                                 | 14,077                  |                         |
| 35,100            |                            |                                 | 15,000                  |                         |

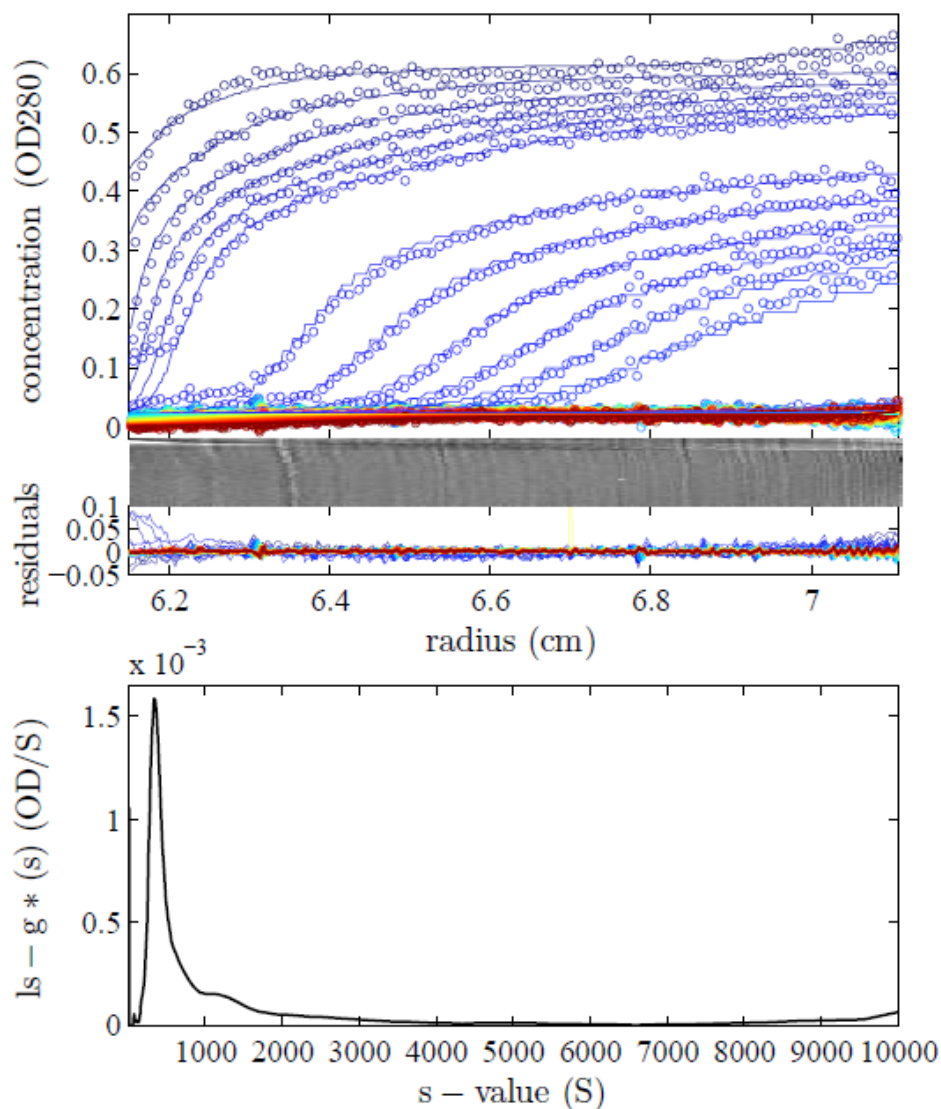

**Figure S1:** Sedimentation coefficient distribution  $|s - g^*(s)|$  of a preparation of DNA coated Au nanoparticles diluted in TRIS buffered saline. Top: Absorbance data at 280 nm (circles, only every 3<sup>rd</sup> data point shown) were acquired in a gravitational sweep experiment using the same ‘extended constant field increase’ rotor speed schedule shown in green in Figure 1, identical to the centrifugal field sequence used in the protein mixture experiments shown in Figure 3. The analysis of the data was carried out with a  $|s - g^*(s)|$  model for a broad distribution of non-diffusing particles, superimposed with a single diffusing species with apparent  $s$ -value of 1.02 S and 12 kDa (based on a partial specific volume scale of 0.73 ml/g in normal solvent conditions at 20 °C). The best-fit model is shown as solid lines. Middle: residuals in overlay and bitmap format, leading to an rmsd of 0.0066 OD. Bottom:  $|s - g^*(s)|$  distribution.

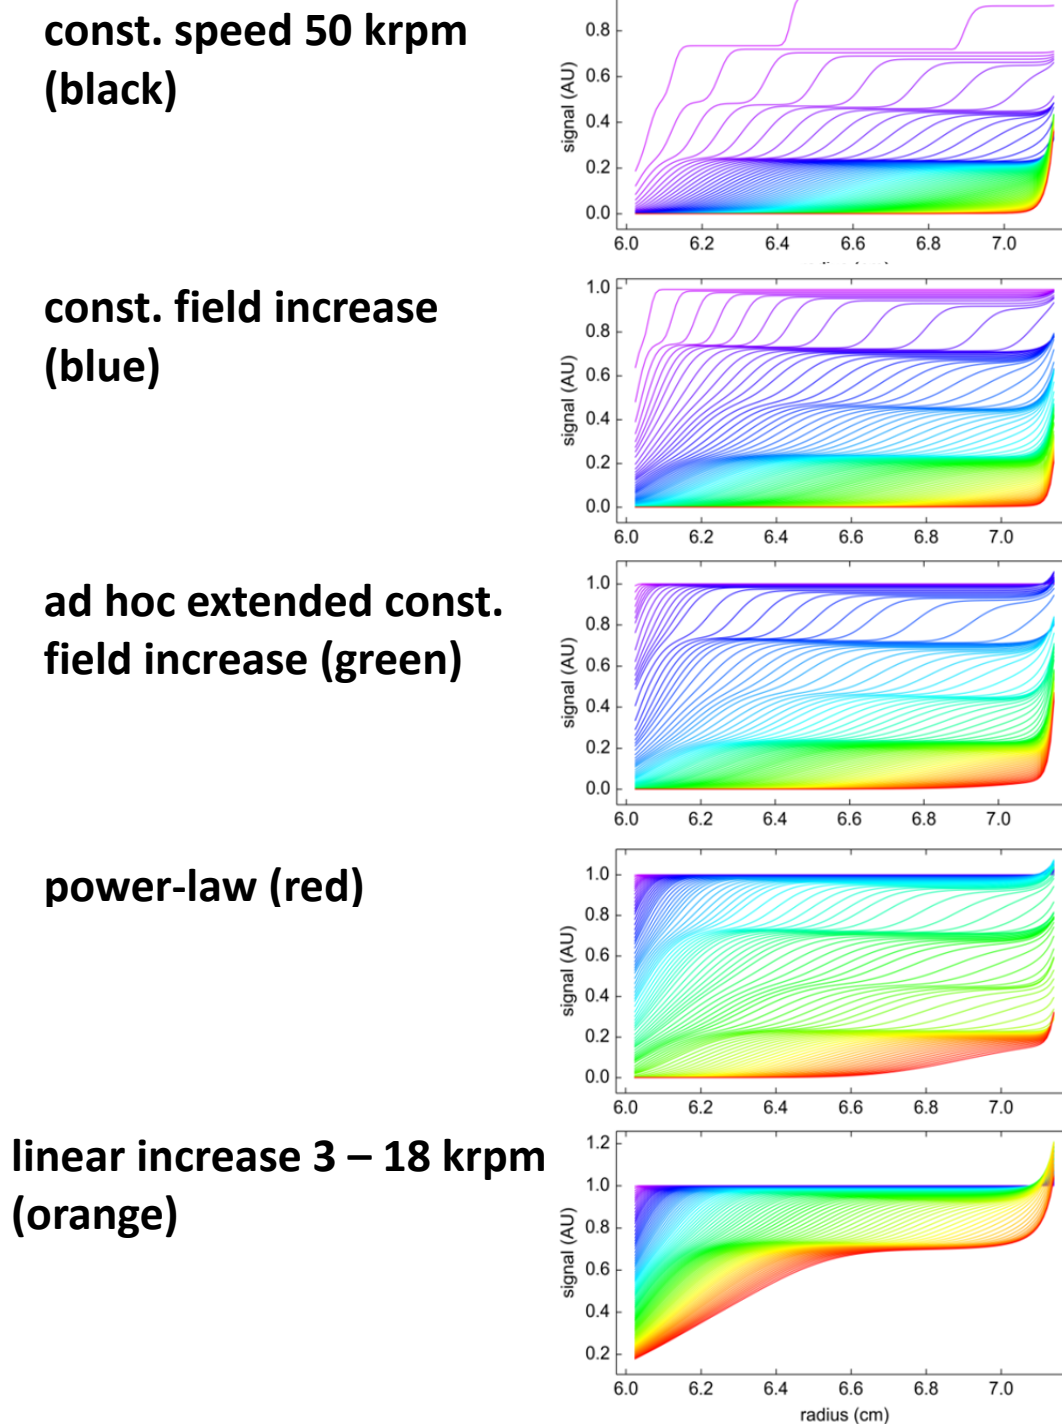

**Figure S2:** Simulated sedimentation profiles for an equal mixture of small to large protein species similar to Fig. 3 (2.5 S, 25 kDa; 10 S, 200 kDa; 20 S, 550 kDa; 70 S, 3.5 Mda) at different rotor speed profiles from Fig. 1. 100 scans are simulated in 10 min intervals, and plotted in the same color temperature indicating time.

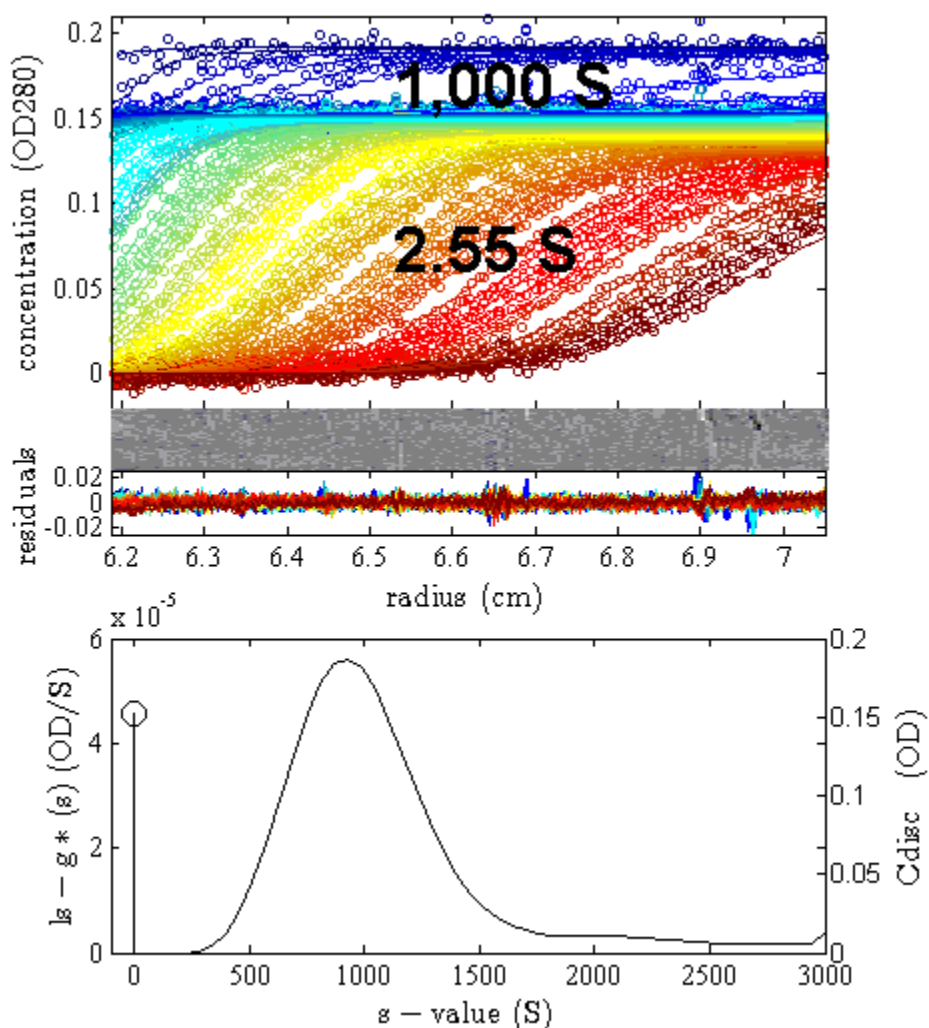

**Figure S3:** Sedimentation coefficient distribution  $lg - g^*(s)$  of an aged preparation of streptavidin-coated 15 nm Au nanoparticles diluted in TRIS buffered saline. Top: Absorbance data at 280 nm (circles, only every 3<sup>rd</sup> data point shown) were acquired in a gravitational sweep experiment using the same ‘extended constant field increase’ rotor speed schedule shown in green in Figure 1, identical to the centrifugal field sequence used in the protein mixture experiments shown in Figure 3. The analysis of the data was carried out with a  $lg - g^*(s)$  model for a broad distribution of non-diffusing particles, combined with an extra single diffusing species with best-fit apparent  $s$ -value of 2.6 S and 40 kDa (based on a partial specific volume scale of 0.73 ml/g in normal solvent conditions at 20 °C). The best-fit model is shown as solid lines. Middle: residuals in overlay and bitmap format, leading to an rmsd of 0.0034 OD. Bottom:  $lg - g^*(s)$  distribution (solid line, left axis) with extra discrete species (stem, right axis).
